# Supplementary material for: Comparison of model and ground observations finds snowpack and blowing snow both contribute to Arctic tropospheric reactive bromine
Source: Copernicus journal article supplement (doi:10.5194/acp-2022-44), 2022-02-16
Supplement: Supplementary file [file acp-2022-44-AC2-supplement.pdf]

# PACK
